# Supplementary material
Source: PubMed Central journal article supplement (PMC6864082)

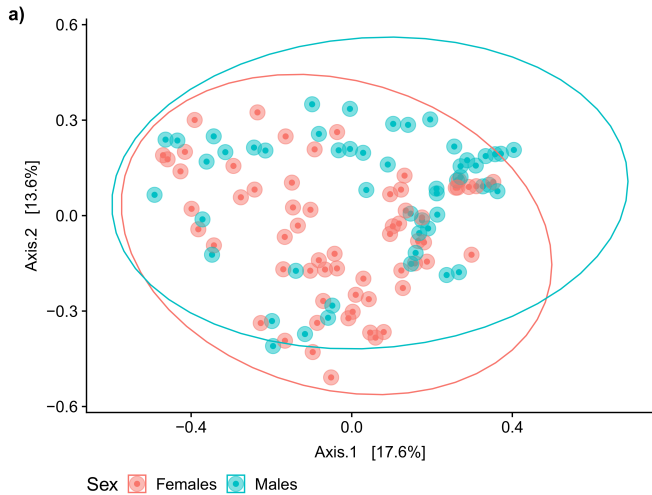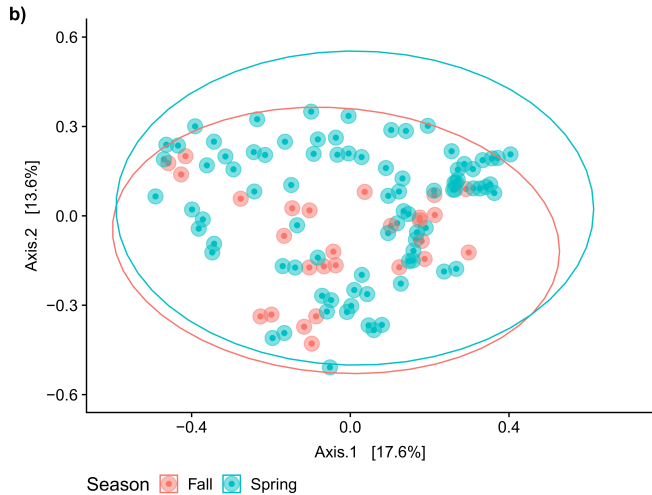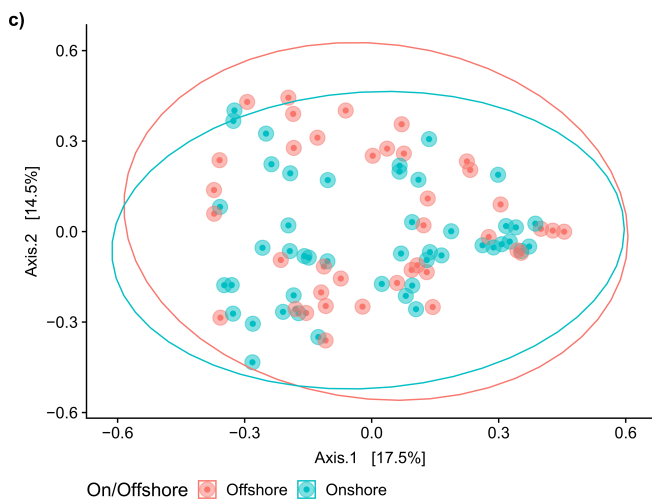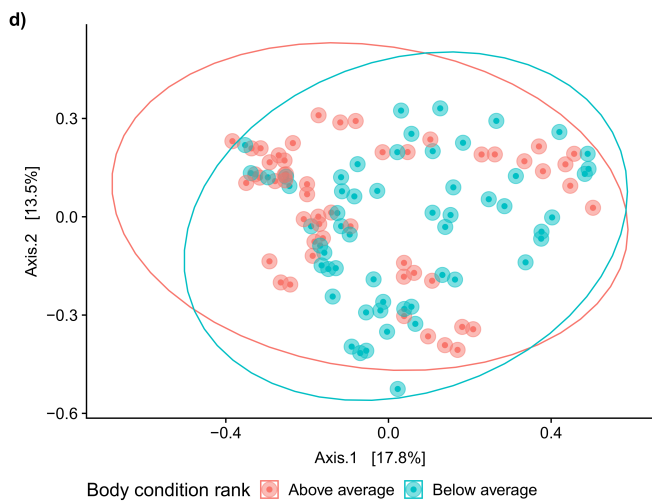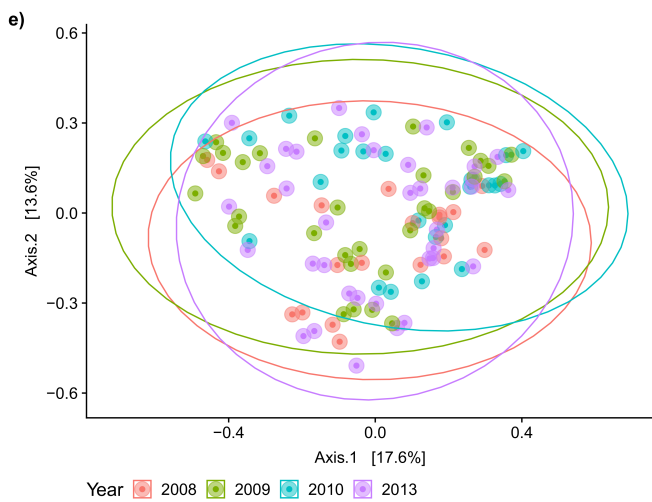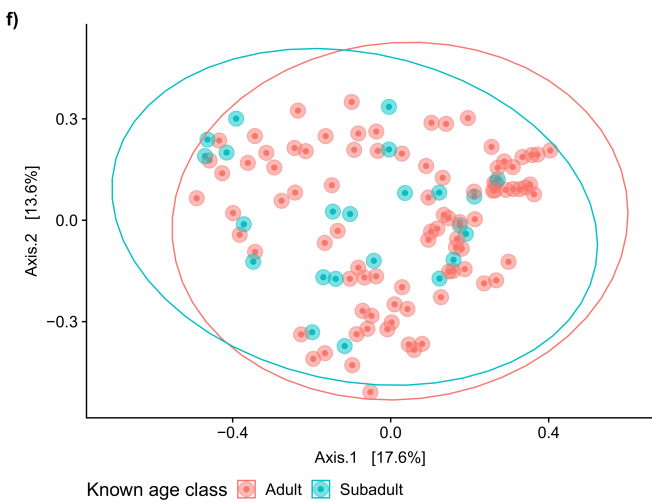

Supplement: 41396_2019_480_MOESM4_ESM.pdf [file 41396_2019_480_MOESM4_ESM.pdf]

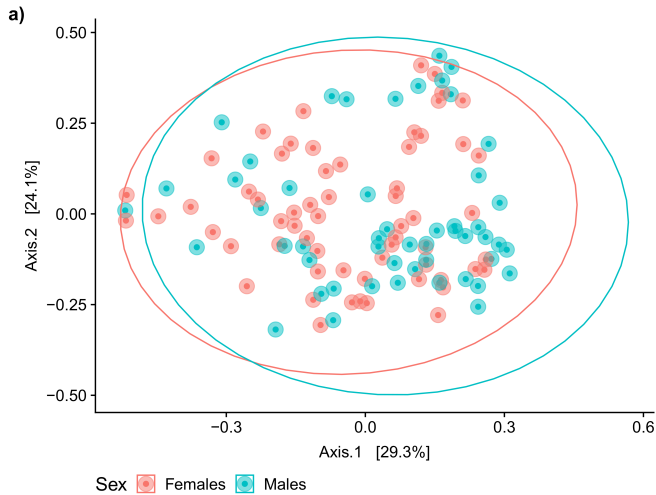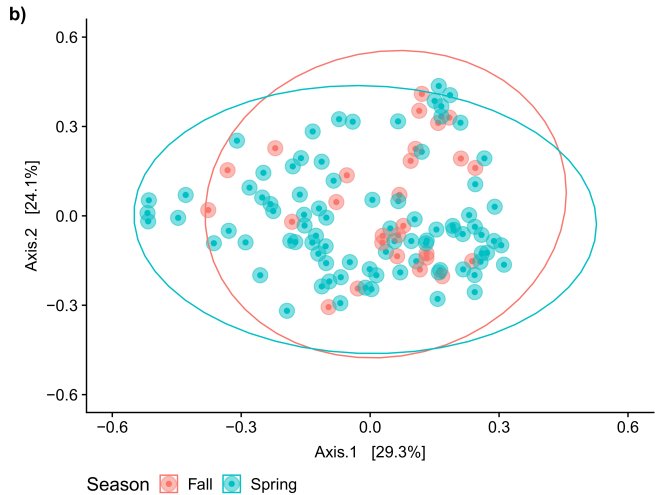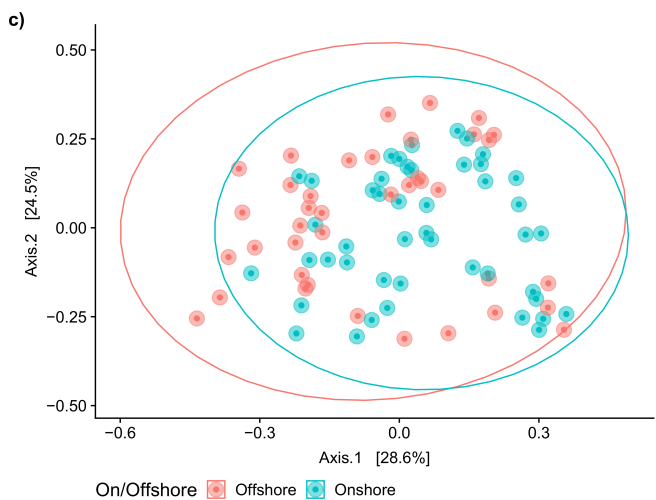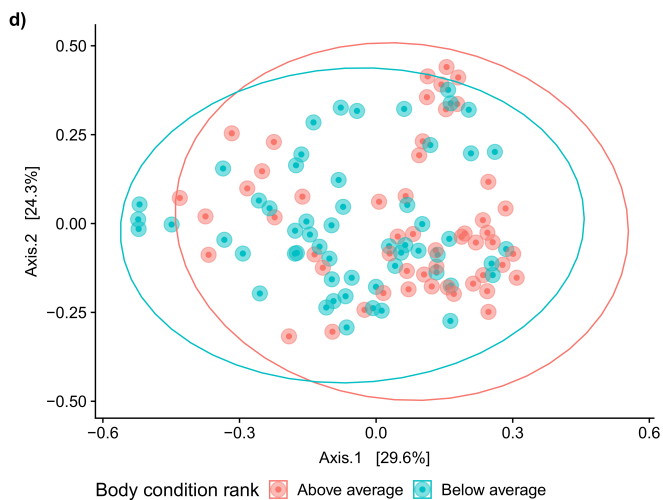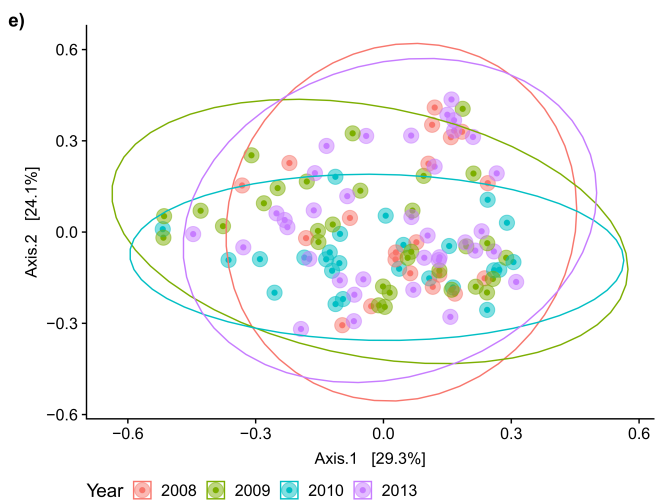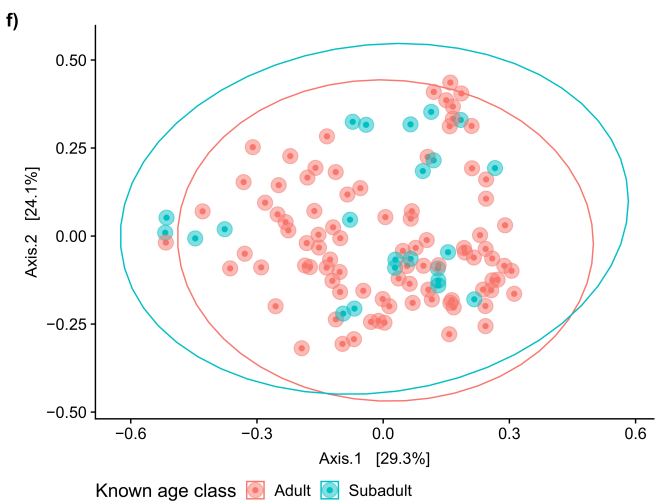

Supplement: 41396_2019_480_MOESM5_ESM.pdf [file 41396_2019_480_MOESM5_ESM.pdf]
